# Supplementary material for: Rosmanol and Carnosol Synergistically Alleviate Rheumatoid Arthritis through Inhibiting TLR4/NF-κB/MAPK Pathway
Source: MDPI journal article supplement (doi:10.3390/molecules27010078), 2021-12-23
Supplement: s1 [file s1]

## The contents determination of rosmannol and carnosol in *Callicarpa longissima*

**Chromatographic conditions:** The standard reference materials and methanol extract of *Callicarpa longissima* were analyzed by LC-2030C HPLC (SHIMADZU, Japan) with C18 column (250 × 4.6 mm, 5μm) at 30°C. The mobile phase, composed of acetonitrile (A) and 0.1% phosphoric acid (B), was applied in gradient elution model as follows: 0-35 min, 35%A-62%A. The flow rate was kept at 0.8 ml/min and detection wavelength was set at 210 nm.

**Preparation of standard reference solution:** Rosmanol (4.69 mg) and carnosol (4.04 mg) were dissolved and quantified in 50 ml volumetric flask with methanol.

**Preparation of sample solution:** 2g powder of branches and leaves of *Callicarpa longissima* was extract with methanol by ultrasonic extractor for 1 h, and the filtered extract solution was quantified in 50 ml volumetric flask with methanol.

**Contents determination:** The stand curves of rosmannol and carnosol were established and used to calculate for contents based on their peak areas in chromatogram of methanol extract of *Callicarpa longissima*. The results showed that contents of rosmannol and carnosol were 0.46 and 2.37 mg/g, respectively.

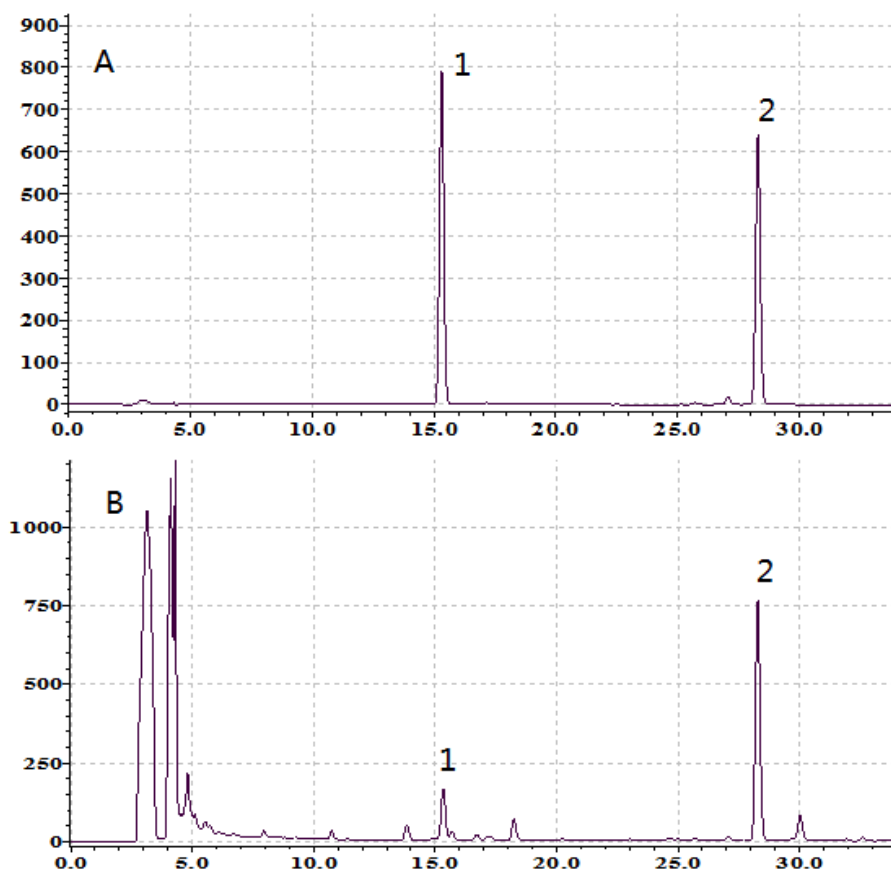

Figure S1. (A) Chromatogram of standard reference materials, in which peak 1, 2 were rosmannol and carnosol, respectively. (B) Chromatogram of methanol extract of *Callicarpa longissima*.

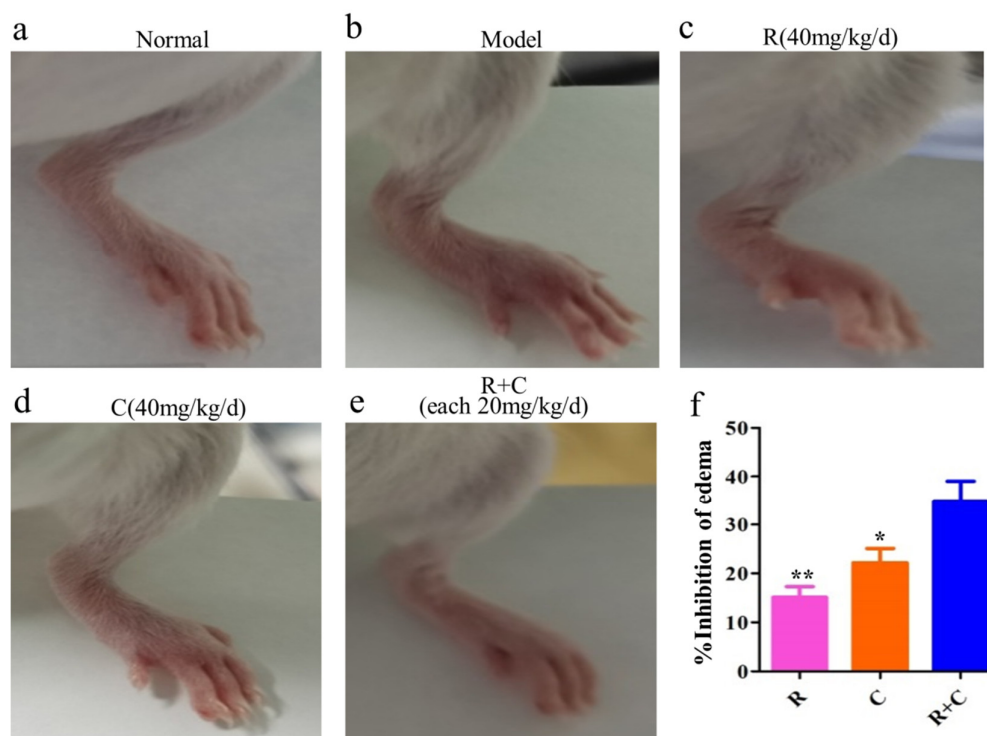

Figure S2. Rosmanol and carnosol synergistically inhibited paw edema in carrageenan-induced Kunming mice model. Paw edema was induced with 1% (w/v) carrageenan suspension by subcutaneous injection. Rosmanol (40 mg/kg), carnosol (40 mg/kg) and their combination (20 mg/kg rosmanol and 20 mg/kg carnosol) were administered by intragastric gavage 1 h before subcutaneous injection. Representative pictures from the left hind limb of the normal group (a), model group (b), rosmanol-treated group (c), carnosol-treated group (d) and combination-treated group (e). Inhibitory rate of rosmanol (R), carnosol (C) and their combination (R+C) on paw edema (f). Data were presented as the mean  $\pm$  sd ( $n = 6$ ). The significance of differences was analyzed by unpaired t-test. \*,  $p < 0.05$  vs the combination-treated group; \*\*,  $p < 0.01$  vs the combination-treated group.

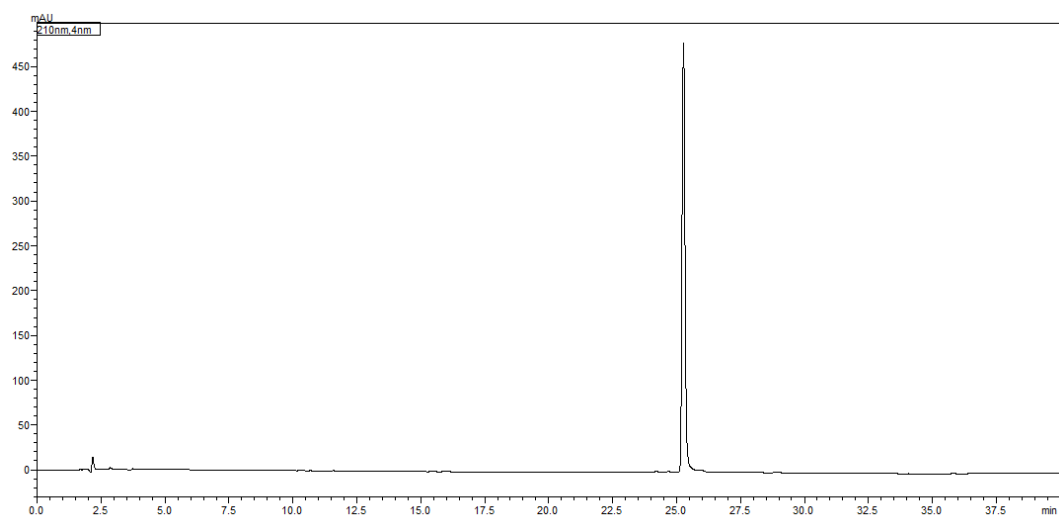

Figure S3. HPLC spectrum of rosmanol (1).

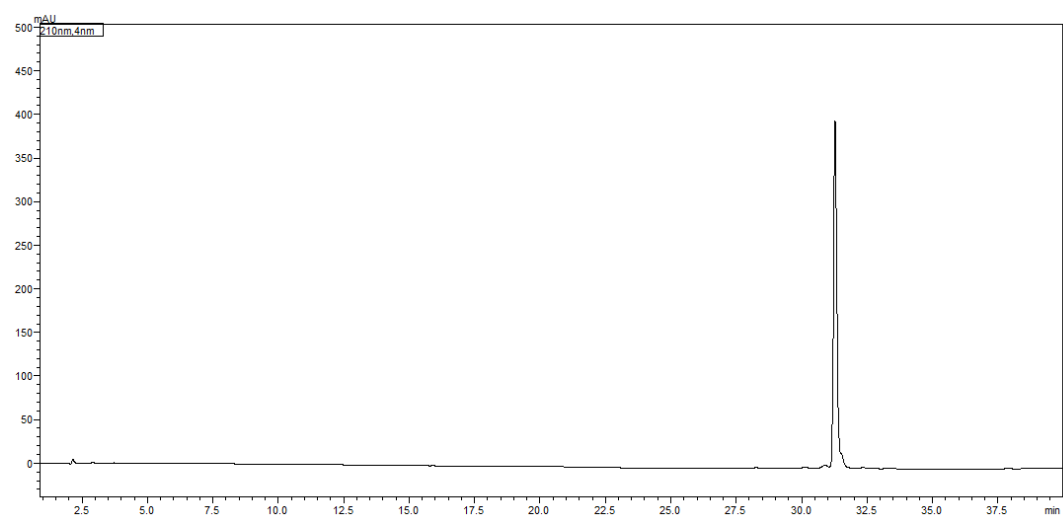

Figure S4. HPLC spectrum of carnosol (2).

## Structure elucidation

Compound **1**, obtained as white powder, had the molecular formula  $C_{20}H_{26}O_5$  on basis of HR-ESI-MS at  $m/z$  345.1688  $[M-H]^-$ .  $^1H$ -NMR (500 MHz,  $CD_3OD$ ),  $\delta_H$ : 6.84 (1H, s, H-14), 4.59 (1H, d,  $J = 3.5$  Hz, H-6 $\alpha$ ), 4.52 (1H, d,  $J = 3.5$  Hz, H-7 $\beta$ ), 3.29 (1H, m, H-1 $\beta$ ), 3.19 (1H, m, H-15), 2.26 (1H, s, H-5), 1.94 (1H, td,  $J = 14.0, 5.5$  Hz, H-1 $\alpha$ ), 1.60 (1H, m, H-2 $\beta$ ), 1.44 (2H, m, H-2 $\alpha, 3\beta$ ), 1.23 (1H, td, 13.5, 3.0 Hz, H-3 $\alpha$ ), 1.21 (3H, d,  $J = 7.0$  Hz, H-16), 1.18 (3H, d,  $J = 7.0$  Hz, H-17), 1.03 (3H, s, H-18), 0.91 (3H, s, H-19);  $^{13}C$ -NMR (125 MHz,  $CD_3OD$ ),  $\delta_C$ : 28.7 (C-1), 20.2 (C-2), 39.5 (C-3), 32.4 (C-4), 51.7 (C-5), 80.0 (C-6), 69.3 (C-7), 129.5 (C-8), 125.1 (C-9), 48.4 (C-10), 145.4 (C-11), 143.5 (C-12), 137.5 (C-13), 120.5 (C-14), 28.0 (C-15), 23.0 (C-16), 23.2 (C-17), 31.9 (C-18), 22.5 (C-19), 181.0 (C-20). The NMR spectral data of **1** were in good agreement with those of rosmanol reported in the reference, so was identified as rosmanol.

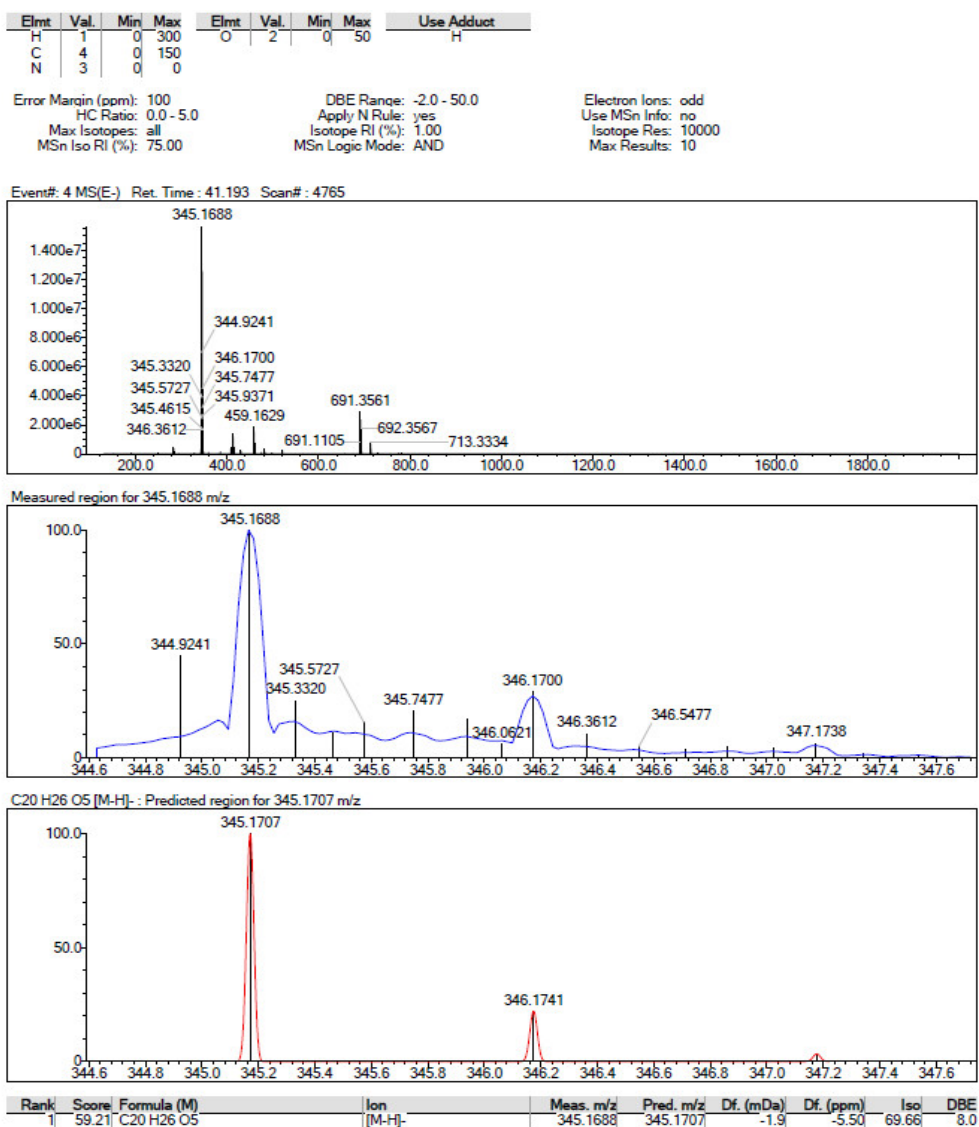

Figure S5. HR-ESI-MS spectrum of rosmanol (**1**).

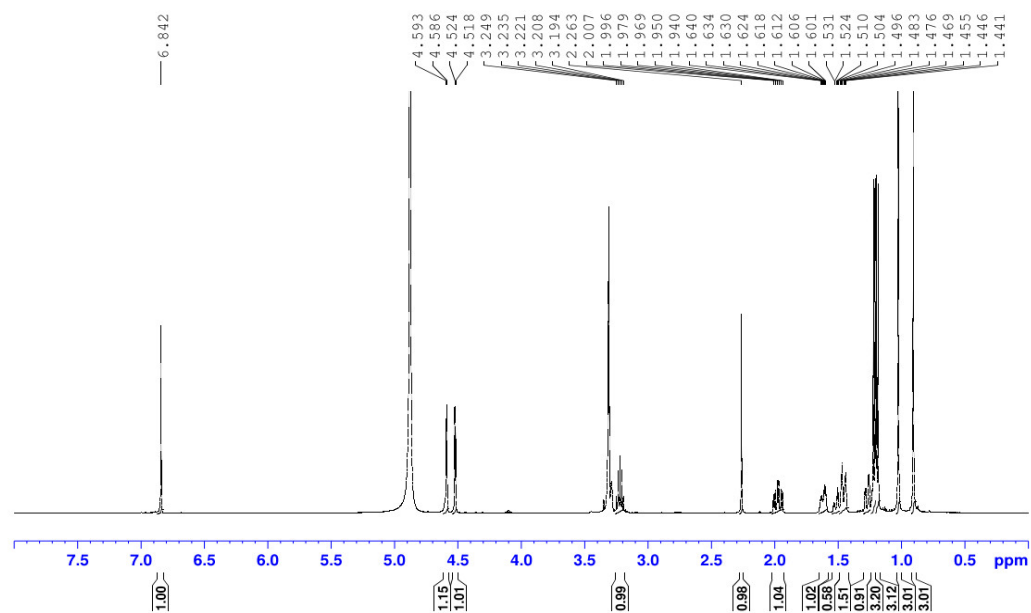

Figure S6.  $^1\text{H}$ -NMR spectrum of rosmanol (**1**) (500 MHz in  $\text{CD}_3\text{OD}$ ).

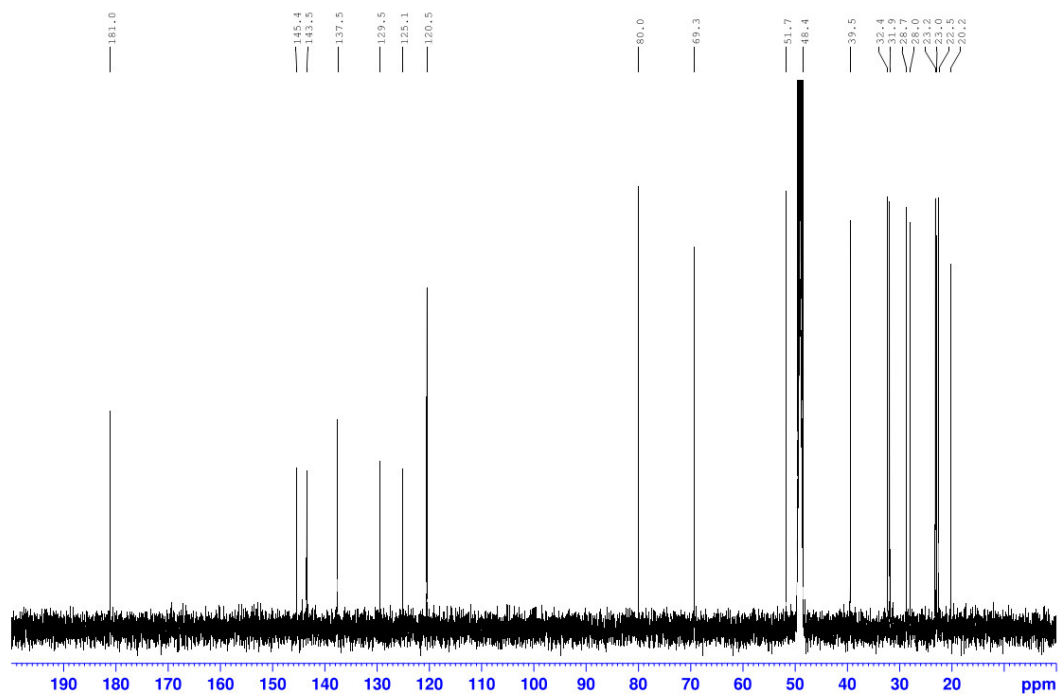

Figure S7.  $^{13}\text{C}$ -NMR spectrum of rosmanol (125 MHz in  $\text{CD}_3\text{OD}$ ).

Compound **2**, obtained as white powder, had the molecular formula  $\text{C}_{20}\text{H}_{26}\text{O}_4$  on basis of HR-ESI-MS  $m/z$  329.1745  $[\text{M}-\text{H}]^-$ .  $^1\text{H}$ -NMR (500 MHz,  $\text{CD}_3\text{OD}$ ),  $\delta_{\text{H}}$ : 6.69 (1H, s, H-14), 5.42 (1H,

d,  $J = 2.0$  Hz, H-7), 3.22 (1H, m, H-15), 2.79 (1H, br d,  $J = 14.5$  Hz, H-1 $\beta$ ), 2.54 (1H, td,  $J = 14.0$ , 4.5 Hz, H-1 $\alpha$ ), 2.18 (1H, m, H-6 $\alpha$ ), 1.83 (2H, m, H-2 $\beta$ , 6 $\beta$ ), 1.68 (1H, dd,  $J = 11.0$ , 6.0 Hz, H-5), 1.61 (1H, m, H-3 $\beta$ ), 1.51 (1H, m, H-2 $\alpha$ ), 1.31 (1H, td,  $J = 13.5$ , 3.5 Hz, H-3 $\alpha$ ), 1.19 (3H, d,  $J = 7.0$  Hz, H-16), 1.18 (3H, d,  $J = 7.0$  Hz, H-17), 0.88 (3H, s, H-18), 0.87 (3H, s, H-19).  $^{13}\text{C}$ -NMR (125 MHz,  $\text{CD}_3\text{OD}$ ),  $\delta_{\text{C}}$ : 30.1 (C-1), 20.0 (C-2), 42.2 (C-3), 35.5 (C-4), 47.0 (C-5), 30.9 (C-6), 79.7 (C-7), 133.3 (C-8), 123.0 (C-9), 49.8 (C-10), 144.7 (C-11), 144.2 (C-12), 136.1 (C-13), 112.5 (C-14), 28.0 (C-15), 23.2 (C-16), 20.1 (C-17), 32.2 (C-18), 23.2 (C-19), 179.3 (C-20). The NMR spectral data of **2** were in good agreement with those of carnosol reported in the reference, so was identified as carnosol.

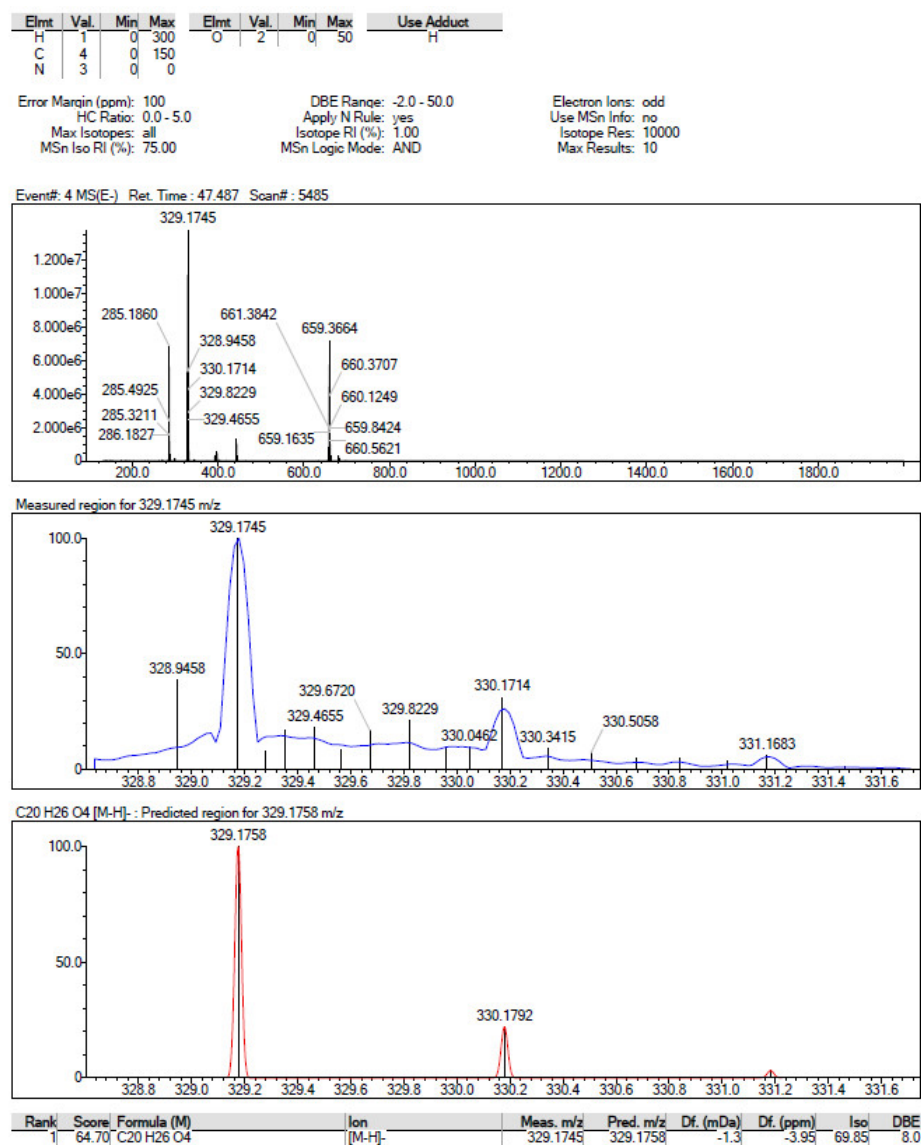

Figure S8. HR-ESI-MS spectrum of carnosol (**2**).

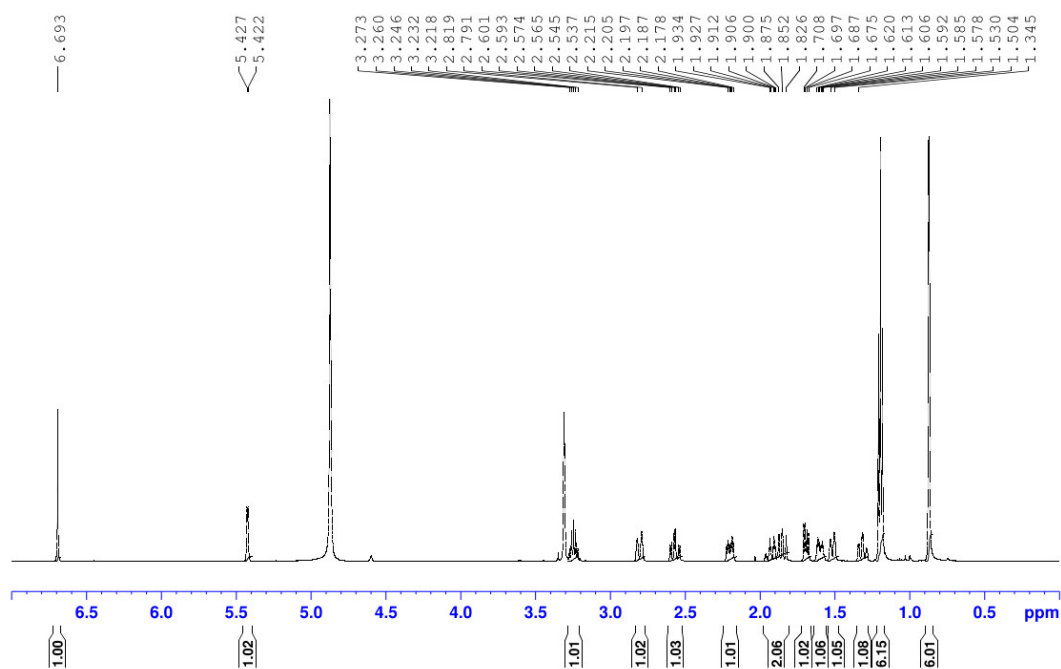

Figure S9. <sup>1</sup>H-NMR spectrum of carnosol (**2**) (500 MHz in CD<sub>3</sub>OD).

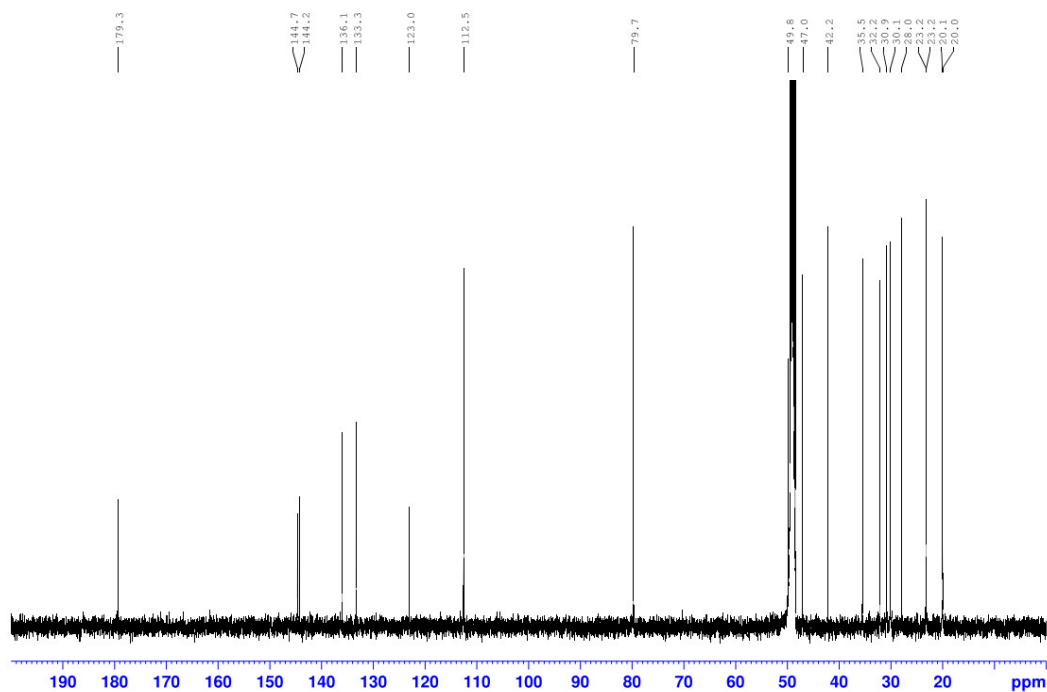

Figure S10. <sup>13</sup>C-NMR spectrum of carnosol (**2**) (125 MHz in CD<sub>3</sub>OD).

Table S1

Effects of rosmanol, carnosol and their combination on body weight in CIA DBA/1 mice

| Groups    | Body weight (g, n=6) |          |          |            |            |
|-----------|----------------------|----------|----------|------------|------------|
|           | d0                   | d21      | d28      | d35        | d42        |
| Normal    | 18.9±0.7             | 21.7±0.8 | 22.5±1.0 | 23.4±1.2** | 24.1±1.3** |
| CIA model | 19.0±0.6             | 21.5±0.9 | 21.3±0.9 | 21.0±1.0   | 20.8±1.2   |
| R         | 18.8±0.7             | 21.4±0.8 | 21.5±0.9 | 21.5±0.9   | 21.7±1.0   |
| C         | 18.7±0.7             | 21.4±0.8 | 21.6±1.0 | 21.9±1.1   | 22.1±1.2   |
| R + C     | 19.1±0.6             | 21.5±0.9 | 21.8±1.1 | 22.3±1.0*  | 22.7±1.3*  |

Compare to CIA model group,\* p&lt;0.05, \*\*p&lt;0.01.
